# Supplementary material
Source: MDPI journal article supplement (https://www.mdpi.com/2073-4395/9/1/12)
Supplement: s1 [file s1]

# Supplementary

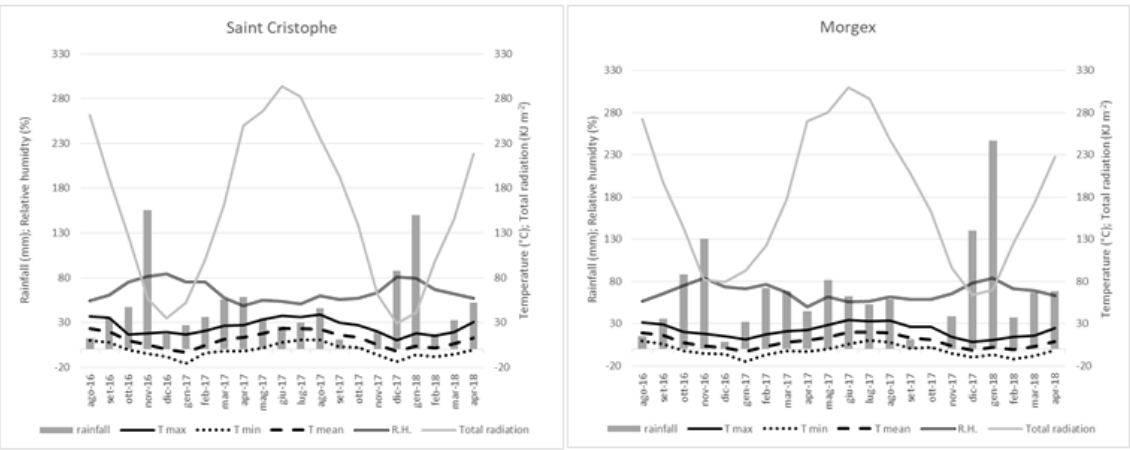

**Figure S1.** Climatic conditions of the Alpine experimental sites.

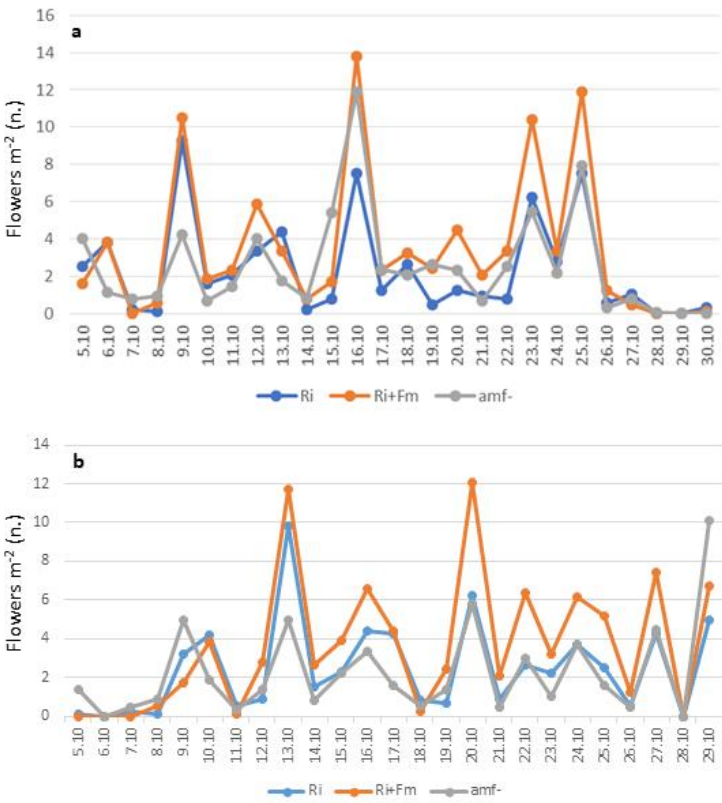

**Figure S2.** Effects of AMF inoculum composed by *Rhizophagus intraradices* and *Funnelformis mosseae* (Ri + Fm), *R. intraradices* alone (Ri), or control (AMF-) on flower production m<sup>2</sup> during the first (a) and second (b) cultivation cycle.

**Table S1.** Physical and chemical properties of the soils collected in the three saffron experimental fields located in the municipality of Saint Cristophe and Morgex (north west Italy).

|                                                    |                 | <b>Saint Cristophe</b> | <b>Morgex</b> |
|----------------------------------------------------|-----------------|------------------------|---------------|
| Texture                                            | Clay (%)        | 3.7                    | 3.8           |
|                                                    | Fine Silt (%)   | 21.8                   | 21.0          |
|                                                    | Coarse Silt (%) | 20.2                   | 14.4          |
|                                                    | Fine Sand (%)   | 24.3                   | 25.0          |
|                                                    | Coarse Sand (%) | 29.9                   | 35.8          |
| Bulk density (g L <sup>-1</sup> )                  |                 | 1123.7                 | 1075.6        |
| Moisture (%)                                       |                 | 17.3                   | 20.2          |
| P Olsen (mg Kg <sup>-1</sup> )                     |                 | 69.2                   | 113.0         |
| pH                                                 |                 | 6.9                    | 7.4           |
| Electrical conductivity (μS/cm <sup>-1</sup> )     |                 | 316                    | 243           |
| N tot (%)                                          |                 | 0.31                   | 0.23          |
| C tot (%)                                          |                 | 3.50                   | 3.79          |
| Cation-exchange capacity (meq 100g <sup>-1</sup> ) |                 | 19.2                   | 15.7          |
| Exchangeable Ca (meq 100g <sup>-1</sup> )          |                 | 17.31                  | 16.61         |
| Exchangeable K (meq 100g <sup>-1</sup> )           |                 | 1.47                   | 0.53          |
| Exchangeable Mg (meq 100g <sup>-1</sup> )          |                 | 1.90                   | 0.76          |

**Table S2.** Characteristics of the HPLC methods applied to analyse the bioactive compounds present in the studied saffron samples.

| HPLC Method | Class          | Standard                                                                                         | Stationary Phase                         | Mobile Phase                                                                                                                                        | Flow (mL min <sup>-1</sup> ) | Time (min)   | Gradient | Wavelength (nm) |
|-------------|----------------|--------------------------------------------------------------------------------------------------|------------------------------------------|-----------------------------------------------------------------------------------------------------------------------------------------------------|------------------------------|--------------|----------|-----------------|
| $\alpha$    | Cinnamic acids | caffeic acid<br>chlorogenic acid<br>coumaric acid<br>ferulic acid<br>hyperoside<br>isoquercitrin | KINETEX – C18 column (4.6 × 150mm, 5 µm) | A: 10mM KH <sub>2</sub> PO <sub>4</sub> /H <sub>3</sub> PO <sub>4</sub> , pH=2.8<br>B: CH <sub>3</sub> CN                                           | 1.5                          | 20 + 2 (CT)  | yes      | 330             |
|             | Flavonols      | quercetin<br>quercitrin<br>rutin                                                                 |                                          |                                                                                                                                                     |                              |              |          |                 |
| $\beta$     | Benzoic acids  | ellagic acid<br>gallic acid                                                                      | KINETEX – C18 column (4.6 × 150mm, 5 µm) | A: H <sub>2</sub> O/CH <sub>3</sub> OH/HCOOH (5:95:0.1 v/v/v), pH=2.5<br>B: CH <sub>3</sub> OH/HCOOH (100:0.1 v/v)                                  | 0.6                          | 23 + 2 (CT)  | yes      | 280             |
|             | Catechins      | catechin<br>epicatechin                                                                          |                                          |                                                                                                                                                     |                              |              |          |                 |
|             | Tannins        | castalagin<br>vescalagin                                                                         |                                          |                                                                                                                                                     |                              |              |          |                 |
| $\gamma$    | Carotenoids    | crocin I<br>crocin II<br>safranal                                                                | KINETEX – C18 column (4.6 × 150mm, 5 µm) | A: H <sub>2</sub> O<br>B: CH <sub>3</sub> CN                                                                                                        | 0.6                          | 35 + 10 (CT) | yes      | 310, 441        |
| $\delta$    | Vitamin C      | ascorbic acid<br>dehydroascorbic acid                                                            | KINETEX – C18 column (4.6 × 150mm, 5 µm) | A: 5 mM C <sub>16</sub> H <sub>33</sub> N(CH <sub>3</sub> ) <sub>3</sub> Br/50 mM KH <sub>2</sub> PO <sub>4</sub> , pH=2.5<br>B: CH <sub>3</sub> OH | 0.9                          | 10 + 5 (CT)  | no       | 261, 348        |

\* CT = conditioning time. Method  $\alpha$ —gradient analysis: 5% B to 21% B in 17 min + 21% B in 3 min + 2 min of conditioning time. Method  $\beta$ —gradient analysis: 3% B to 85% B in 22 min + 85% B in 1 min + 2 min of conditioning time. Method  $\chi$  - gradient analysis: 5%B to 95%B in 30 min + 95%B to 5%B in 5 min + 10 min of conditioning time. Method  $\delta$  - isocratic analysis: 10 min + 5 min of conditioning time.
